# Supplementary material for: Cost-Effectiveness of Early Detection and Prevention Strategies for Endometrial Cancer—A Systematic Review
Source: MDPI journal article supplement (doi:10.3390/cancers12071874), 2020-07-11
Supplement: s1 [file s1]

# Supplementary Materials: Cost-Effectiveness of Early Detection and Prevention Strategies for Endometrial Cancer—A Systematic Review

Gaby Sroczynski, Artemisa Gogollari, Annette Conrads-Frank, Lára R. Hallsson, Nora Pashayan, Martin Widschwendter and Uwe Siebert

**Table S1.** Search strategies. Databases searched and search codes.

| Database     | Search Codes                                                                                                                                                                                                                                                                                                                                                                                                                                                                                                                                                                       | Number of Publications Found |
|--------------|------------------------------------------------------------------------------------------------------------------------------------------------------------------------------------------------------------------------------------------------------------------------------------------------------------------------------------------------------------------------------------------------------------------------------------------------------------------------------------------------------------------------------------------------------------------------------------|------------------------------|
| PubMed       | Search strategy: 25/03/2019<br>Search (((((((endometr*) AND (((neoplasm*) OR carcinom*) OR tumor*) OR cancer*)) OR "Endometrial Neoplasms"[Mesh])) AND (((detection) OR prevention) OR screening)) AND (((economic*) AND *model*) OR (((Benefit*) OR Utilit*) OR Effectiv*)) AND cost*)) OR ((QALY) OR (((qualit*) AND *adjusted*) AND life*) AND year*))) AND (((((((markov*) AND ((*model*) OR *chain*))) OR "Markov Chains"[Mesh]) OR "Monte Carlo Method"[Mesh]) OR ((decision*) AND ((*tree*) OR *analy*) OR *model*)) OR discrete event simulation) OR *simulat*) OR model*) | 77 Hits                      |
|              | Search update: 28/01/2020                                                                                                                                                                                                                                                                                                                                                                                                                                                                                                                                                          | 0 Hits                       |
|              | Search strategy: 28/04/2016<br>1. (Screening)<br>2. (Early detection)<br>3. (Prevention)<br>4. (endometr*) AND (cancer)<br>5. (microsimulation NEAR model*) OR (micro-simulation NEAR model*) OR (MISCAN)<br>6. (Markov NEXT model*) OR (mathematic* NEAR model*) OR (computer* NEAR model*)<br>7. (decision NEAR model*) OR (analytic* NEAR model*)<br>8. MeSH DESCRIPTOR Markov Chains EXPLODE ALL TREES<br>9. MeSH DESCRIPTOR Computer Simulation EXPLODE ALL TREES<br>10. #1 OR #2 OR #3<br>11. #5 OR #6 OR #7 OR #8 OR #9<br>12. #4 AND #10 AND #11                           | 28 Hits                      |
| CRD database | Search update: 28/01/2020                                                                                                                                                                                                                                                                                                                                                                                                                                                                                                                                                          | 0 Hits                       |
|              | Search strategy: 28/04/2016<br>1. (microsimulation adj3 model*).mp.<br>2. (analytic* adj5 model*).mp<br>3. (decision adj5 model*).mp<br>4. (computer* adj5 model*).mp<br>5. (Markov adj Model*).mp<br>6. (mathematic* adj model*).mp<br>7. (micro-simulation adj3 model*).mp<br>8. MISCAN.mp<br>9. exp Markov Chains<br>10. Prevention.ti,ab<br>11. Screening.ti,ab<br>12. Early detection.ti,ab<br>13. Endometrial Cancer.ti,ab<br>14. 10 or 11 or 12<br>15. 1 or 2 or 3 or 4 or 5 or 6 or 7 or 8 or 9<br>16. 13 and 14 and 15                                                    | 9 Hits                       |
|              |                                                                                                                                                                                                                                                                                                                                                                                                                                                                                                                                                                                    |                              |
| Ovid Medline |                                                                                                                                                                                                                                                                                                                                                                                                                                                                                                                                                                                    |                              |

|                      |                                                                                                    |          |
|----------------------|----------------------------------------------------------------------------------------------------|----------|
|                      | Search update: 28/01/2020                                                                          | 5 Hits   |
|                      | Search strategy: 28.04.2016                                                                        |          |
|                      | 1. Endometrial Cancer.ti,ab                                                                        |          |
|                      | 2. Early detection.ti,ab                                                                           |          |
|                      | 3. Screening.ti,ab                                                                                 |          |
|                      | 4. Prevention.ti,ab                                                                                |          |
|                      | 5. exp Computer Simulation                                                                         |          |
|                      | 6. (microsimulation adj3 model*).mp                                                                |          |
|                      | 7. MISCAN.mp                                                                                       |          |
| Embase               | 8. exp Markov Chains                                                                               | 100 Hits |
|                      | 9. (micro-simulation adj3 model*).mp                                                               |          |
|                      | 10. (mathematic* adj model*).mp                                                                    |          |
|                      | 11. (Markov adj Model*).mp                                                                         |          |
|                      | 12. (decision adj5 model*).mp                                                                      |          |
|                      | 13. (computer* adj5 model*).mp                                                                     |          |
|                      | 14. 2 or 3 or 4                                                                                    |          |
|                      | 15. 5 or 6 or 7 or 8 or 9 or 10 or 11 or 12                                                        |          |
|                      | 16. 1 and 14 and 15                                                                                |          |
|                      | Search update: 28/01/2020                                                                          | 11 Hits  |
| EconLit              | Search strategy: 28.04.2016                                                                        | 1 Hit    |
|                      | S1: Endometrial AND Cancer                                                                         |          |
|                      | Search update: 28/01/2020                                                                          | 2 Hits   |
|                      | Search strategy: 29.04.2016                                                                        |          |
|                      | 1. Endometrial and Cancer (Word variations have been searched)                                     |          |
|                      | 2. Screening or Prevention or Prophylactic or Early detection (Word variations have been searched) |          |
|                      | 3. microsimulation near model* (Word variations have been searched)                                |          |
|                      | 4. micro-simulation near model*:ti,ab,kw (Word variations have been searched)                      |          |
|                      | 5. MISCAN (Word variations have been searched)                                                     |          |
|                      | 6. Markov next Model* (Word variations have been searched)                                         |          |
|                      | 7. MeSH descriptor: [Markov Chains] explode all trees                                              |          |
|                      | 8. mathematic* near model* (Word variations have been searched)                                    |          |
|                      | 9. MeSH descriptor: [Computer Simulation] explode all trees                                        |          |
|                      | 10. computer* near model* (Word variations have been searched)                                     |          |
|                      | 11. analytic* near model* (Word variations have been searched)                                     |          |
|                      | 12. decision near model* (Word variations have been searched)                                      |          |
|                      | 13. #3 or #4 or #5 or #6 or #7 or #8 or #9 or #10 or #11 or #12                                    |          |
|                      | 14. #1 and #2                                                                                      |          |
|                      | 15. #13 and #14 in Economic Evaluations                                                            |          |
| The Cochrane Library | Search update: 28/01/2020                                                                          | 2 Hits   |
|                      | Total                                                                                              | 217 Hits |
|                      | Total after search update                                                                          | 235 Hits |
|                      | Total after removing the duplicates                                                                | 125 Hits |

Table S2. List of abbreviations.

| GDP-PPP | Gross Domestic Product - Purchasing Power Parities              |
|---------|-----------------------------------------------------------------|
| CPI     | Consumer Price Index                                            |
| LY      | Life years                                                      |
| LYG     | Life-years gained                                               |
| QALY    | quality-adjusted life years                                     |
| ICER    | Incremental cost-effectiveness ratio                            |
| ICUR    | Incremental cost-utility ratio                                  |
| Incr.   | Incremental                                                     |
| CHEERS  | The Consolidated Health Economic Evaluation Reporting Standards |
| WTP     | Willingness-to-pay                                              |
| WHO     | World Health Organization                                       |

|         |                                              |
|---------|----------------------------------------------|
| BMI     | Body mass index                              |
| ACER    | Average cost-effectiveness ratio,            |
| PBSO    | Prophylactic bilateral salpingo-oophorectomy |
| EB      | Endometrial biopsy                           |
| yrs     | Years                                        |
| Dom     | Dominated                                    |
| n.r.    | Not reported                                 |
| Ext dom | Extended dominance                           |
| SA      | Sensitivity analyses                         |
| TVS     | Transvaginal sonography                      |
| CA-125  | The cancer-antigen-125                       |

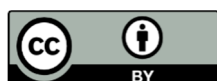

© 2020 by the authors. Licensee MDPI, Basel, Switzerland. This article is an open access article distributed under the terms and conditions of the Creative Commons Attribution (CC BY) license (<http://creativecommons.org/licenses/by/4.0/>).
